# Supplementary material for: Psychosocial interventions for community-dwelling individuals with schizophrenia: study protocol for a systematic review and meta-analysis
Source: HighWire-hosted journal article supplement (doi:10.1136/bmjopen-2021-057286), 2022-04-01
Supplement: bmjopen-2021-057286supp001_data_supplement.pdf [file bmjopen-2021-057286supp001_data_supplement.pdf]

**Supplementary Appendix 1.** Type and description of psychosocial interventions

| <b>Type of intervention</b>       | <b>Description</b>                                                                                                                                                                                                                                                                                                                   |
|-----------------------------------|--------------------------------------------------------------------------------------------------------------------------------------------------------------------------------------------------------------------------------------------------------------------------------------------------------------------------------------|
| Acceptance and commitment therapy | A third-generation behavioural therapy that incorporates acceptance and mindfulness-based strategies to help individuals in overcoming negative thoughts and feelings.                                                                                                                                                               |
| Assertive community treatment     | An intensive, outreach-oriented, community-based model that serves as a platform for integrating elements of several psychosocial interventions to provide clinical assessments and crisis interventions, along with psychosocial and functional assistance with comprehensive community care delivered by a multidisciplinary team. |
| Case management                   | Each person is usually assigned to a case manager who contacts the person regularly and can provide more intensive support in case of particularly acute needs.                                                                                                                                                                      |
| Cognitive adaptation training     | Employs environmental supports to target severe functional impairments associated with schizophrenia. These supports include techniques such as labelling and utilisation of signs and alarms in an individual's environment to assist in activities of daily living, and encourage self-care and medication management.             |
| Cognitive behavioural therapy     | Focuses on the relationship among thoughts, emotions, and behaviours and teaches individuals coping skills to manage illness-related distress, recognize triggers related to symptom exacerbation, and evaluate maladaptive beliefs.                                                                                                 |
| Cognitive training                | A programme of regular activities aimed at maintaining and improving cognitive abilities such as memory and attention, language expression and logic, coordination, and cognitive rehabilitation.                                                                                                                                    |
| Cognitive remediation             | Use of cognitive practices and teaching strategies to target cognitive impairments related to schizophrenia (e.g., memory, attention, executive functioning, social cognition). Cognitive remediation can be done on a computer or with paper and pencil.                                                                            |
| Family interventions              | An intervention involving the relatives of the person, which can have several different aims. These include construction of                                                                                                                                                                                                          |

|                                                  |                                                                                                                                                                                                                                                                                                                                                                                                                                                                     |
|--------------------------------------------------|---------------------------------------------------------------------------------------------------------------------------------------------------------------------------------------------------------------------------------------------------------------------------------------------------------------------------------------------------------------------------------------------------------------------------------------------------------------------|
|                                                  | an alliance with relatives who care for the person with schizophrenia, reduction of adverse family atmosphere, enhancement of the capacity of relatives to anticipate and solve problems, maintenance of reasonable expectations for patient performance, and attainment of desirable change in relatives' behaviour and belief systems.                                                                                                                            |
| Illness management and recovery                  | Teaches illness self-management strategies to people with schizophrenia, and comprises five empirically based strategies: psychoeducation to improve understanding about mental illness and treatment; cognitive-behavioural approaches to improve medication adherence; training in the prevention of relapses; social skills training to buffer stress and strengthen social support; and teaching coping skills to reduce the distress and severity of symptoms. |
| Integrated interventions                         | A combination of different treatments (e.g. individual cognitive behavioural therapy plus family intervention plus assertive outreach).                                                                                                                                                                                                                                                                                                                             |
| Interventions for physical health problems       | Aims to treat/manage co-occurring physical health problems (e.g. psychosocial weight loss intervention)                                                                                                                                                                                                                                                                                                                                                             |
| Interventions for comorbid psychiatric disorders | Aims to treat/manage comorbid psychiatric disorders (e.g. depression, substance use disorder, post-traumatic stress disorder)                                                                                                                                                                                                                                                                                                                                       |
| Metacognitive training                           | A form of cognitive behavioural therapy that focuses specifically on meta-cognitions. It aims to convince individuals to gather more information, that is, to diminish a jumping to conclusions bias, and to reduce overconfidence in errors, especially for momentous decisions.                                                                                                                                                                                   |
| Mental health dialogues                          | A community forum where service users, carers, friends, mental health workers, and others with an interest in mental health participate in an open dialogue. Meetings address different topics. Dialogues facilitate a discrete and independent form of acquisition and production of knowledge, and drive recovery-oriented changes in communication and structures.                                                                                               |
| Mindfulness-based interventions                  | Consist of guided meditation followed by reflective group discussion aimed at facilitating understanding or                                                                                                                                                                                                                                                                                                                                                         |

---

|                           |                                                                                                                                                                                                                                                                                                                                                                                                                                                                                                                                                                                                                                                                                                                                                              |
|---------------------------|--------------------------------------------------------------------------------------------------------------------------------------------------------------------------------------------------------------------------------------------------------------------------------------------------------------------------------------------------------------------------------------------------------------------------------------------------------------------------------------------------------------------------------------------------------------------------------------------------------------------------------------------------------------------------------------------------------------------------------------------------------------|
|                           | <p>metacognitive insight. Individuals bring full awareness to difficult voices, feelings, thoughts, and images, and also become aware of habitual coping reactions, safety behaviours, and their effects. They practise letting go of these reactions and learn to allow and observe psychotic experiences without reacting. Meditation and discussion lead to the insight that struggling, judging, and ruminating on psychotic experience creates distress, while mindful observation and acceptance of psychotic experience is empowering and calming.</p>                                                                                                                                                                                                |
| Motivational interviewing | <p>A client-centred, directive method, through which individuals are engaged in strategically directed conversations about their problems. It explores personal ideas and ambivalences, eliciting and selectively reinforcing so-called change talk, by which discrepancies between the present behaviour and the individual's own future goals are amplified. The overall goal is to increase the individual's intrinsic motivation for change. In individuals with schizophrenia, it can be used to focus on specific impacts of illness behaviours on the individuals, and provide them with opportunities to engage and discuss their ambivalent attitudes towards their illness behaviours, treatments, and possible consequences of non-adherence.</p> |
| Open dialogue             | <p>A model of mental health care that involves a consistent family and social network approach where all treatment is carried out via a whole system/network meeting, which always includes the individuals with schizophrenia. Key principles and elements include providing immediate help, involving the social network, flexibility and continuity of the treatment team, and a particular emphasis on the creation of dialogue within network meetings.</p>                                                                                                                                                                                                                                                                                             |
| Psychoeducation           | <p>Psychoeducation can be defined as the education of a person with schizophrenia in subject areas that serve the goals of treatment and rehabilitation. In individuals with schizophrenia, it usually covers the following topics: symptoms of psychosis, models of psychosis, effects and side-effects of medication, maintenance of medication,</p>                                                                                                                                                                                                                                                                                                                                                                                                       |

---

|                               |                                                                                                                                                                                                                                                                                                                                                                                                                                                                                                                                                                                                                                                                                                                                                             |
|-------------------------------|-------------------------------------------------------------------------------------------------------------------------------------------------------------------------------------------------------------------------------------------------------------------------------------------------------------------------------------------------------------------------------------------------------------------------------------------------------------------------------------------------------------------------------------------------------------------------------------------------------------------------------------------------------------------------------------------------------------------------------------------------------------|
|                               | psychotherapy for psychosis, early symptoms of relapse, and relapse prevention.                                                                                                                                                                                                                                                                                                                                                                                                                                                                                                                                                                                                                                                                             |
| REFOCUS                       | Manualised intervention aims to increase the recovery orientation of community adult mental health teams. Staff are trained and supported through reflection sessions and supervision to use three working practices. First, to maximize person-centred care planning, staff discuss the values and treatment preferences of the service user, using conversational, narrative and visual approaches. Second, staff use a standardized assessment to identify the service user's strengths, so that care planning will be focused on amplifying strengths and the ability to access community supports, as well as focusing on deficit amelioration. Third, staff support active goal-striving by the service user towards his/her personally valued goals. |
| Relapse prevention programmes | Interventions that generally include education for recognising early symptoms of relapse, a system of symptoms monitoring, and a crisis plan and intervention in case symptoms increase over a certain threshold.                                                                                                                                                                                                                                                                                                                                                                                                                                                                                                                                           |
| Relatives group               | Support groups for relatives of the person with schizophrenia, where they meet without the person with the aim of sharing experiences and providing mutual support and empathic discussion about caregiving experiences. The groups are usually peer led, without the direct involvement of an expert. The peer leader facilitates empathic and supportive responses to individual needs and concerns.                                                                                                                                                                                                                                                                                                                                                      |
| Peer-support                  | Support or services provided to people with schizophrenia by other people who have experienced schizophrenia themselves. It may promote self-efficacy and hope through sharing experiential knowledge and through modelling recovery and coping strategies                                                                                                                                                                                                                                                                                                                                                                                                                                                                                                  |
| Skills training               | Aims to improve social interactions, independent living, and other outcomes that have clear relevance to community functioning. Skills training programs vary widely in content but typically include a focus on interpersonal skills and share several key elements, including behaviourally based                                                                                                                                                                                                                                                                                                                                                                                                                                                         |

---

|                                   |                                                                                                                                                                                                                                                                                                                                                                                                                                                                                                                                                                                   |
|-----------------------------------|-----------------------------------------------------------------------------------------------------------------------------------------------------------------------------------------------------------------------------------------------------------------------------------------------------------------------------------------------------------------------------------------------------------------------------------------------------------------------------------------------------------------------------------------------------------------------------------|
|                                   | instruction, role modelling, rehearsal, corrective feedback, and positive reinforcement.                                                                                                                                                                                                                                                                                                                                                                                                                                                                                          |
| Supported housing                 | An approach to helping people with schizophrenia establish and maintain stable residences with the ongoing support of mental health professionals                                                                                                                                                                                                                                                                                                                                                                                                                                 |
| Supported employment              | Assists individuals with schizophrenia in finding competitive employment, supports them in that employment, and teaches them skills and strategies to help maintain that employment (also known as individual placement and support). The key elements include individually tailored job development, rapid job search, availability of ongoing job supports, and integration of vocational and mental health services.                                                                                                                                                           |
| Wellness recovery action planning | The wellness recovery action planning (WRAP) tools and processes support self-management with a specific focus on recovery-oriented mental health services. WRAP is used to create recovery plans by guiding individuals and groups of people to reflect on what has assisted them in staying well in the past, and to consider strategies that assisted others with their recovery. Planning tools focus on self-management, from identifying fundamental strategies that enhance daily well-being to recognizing and dealing with triggers to distress through crisis planning. |

---

**Supplementary Appendix 2.** Search strategy in different databases

## PubMed

| Line | Query                                                                                                                                                                                                                                                                                                                                                                                                                                                                                                                                                                                                                                                                                                                                                                                                                                                                                                                                                                                                                                                                                                                                                                                                                                                                                                                                                                                                                                                                                                                                                                                                                                                                                                                                                                                                                                                                                                                                                                                                                                                                                                                                                                                                                                                                                                                                                                                                 |
|------|-------------------------------------------------------------------------------------------------------------------------------------------------------------------------------------------------------------------------------------------------------------------------------------------------------------------------------------------------------------------------------------------------------------------------------------------------------------------------------------------------------------------------------------------------------------------------------------------------------------------------------------------------------------------------------------------------------------------------------------------------------------------------------------------------------------------------------------------------------------------------------------------------------------------------------------------------------------------------------------------------------------------------------------------------------------------------------------------------------------------------------------------------------------------------------------------------------------------------------------------------------------------------------------------------------------------------------------------------------------------------------------------------------------------------------------------------------------------------------------------------------------------------------------------------------------------------------------------------------------------------------------------------------------------------------------------------------------------------------------------------------------------------------------------------------------------------------------------------------------------------------------------------------------------------------------------------------------------------------------------------------------------------------------------------------------------------------------------------------------------------------------------------------------------------------------------------------------------------------------------------------------------------------------------------------------------------------------------------------------------------------------------------------|
| 1    | "schizophrenia spectrum and other psychotic disorders"[MeSH Terms] OR<br>"schizo*"[Title/Abstract] OR "psychotic*"[Title/Abstract] OR<br>"psychosis"[Title/Abstract] OR "psychoses"[Title/Abstract]                                                                                                                                                                                                                                                                                                                                                                                                                                                                                                                                                                                                                                                                                                                                                                                                                                                                                                                                                                                                                                                                                                                                                                                                                                                                                                                                                                                                                                                                                                                                                                                                                                                                                                                                                                                                                                                                                                                                                                                                                                                                                                                                                                                                   |
| 2    | "psychotherapy"[MeSH Terms] OR "psychoanalysis"[MeSH Terms] OR<br>"counseling"[MeSH Terms] OR "community mental health services"[Mesh Terms]<br>OR "psychiatric rehabilitation"[Mesh Terms] OR "acceptance and commitment<br>therap*"[Title/Abstract] OR "assertive communit*"[Title/Abstract] OR "behavior<br>modificat*"[Title/Abstract] OR "behavior regulat*"[Title/Abstract] OR "behavior<br>therap*"[Title/Abstract] OR "behaviour modificat*"[Title/Abstract] OR "behaviour<br>regulat*"[Title/Abstract] OR "behaviour therap*"[Title/Abstract] OR "behavioral<br>modificat*"[Title/Abstract] OR "behavioral regulat*"[Title/Abstract] OR "behavioral<br>therap*"[Title/Abstract] OR "behavioural modificat*"[Title/Abstract] OR<br>"behavioural regulat*"[Title/Abstract] OR "behavioural therap*"[Title/Abstract] OR<br>"cognitive behavio*"[Title/Abstract] OR "cognitive intervent*"[Title/Abstract] OR<br>"cognitive rehabilitat*"[Title/Abstract] OR "cognitive remediat*"[Title/Abstract] OR<br>"cognitive technique*"[Title/Abstract] OR "cognitive therap*"[Title/Abstract] OR<br>"cognitive treatment*"[Title/Abstract] OR "compassion focused"[Title/Abstract] OR<br>"conversational therap*"[Title/Abstract] OR "conversion therap*"[Title/Abstract] OR<br>"counseling"[Title/Abstract] OR "counselling"[Title/Abstract] OR "emotion<br>focused"[Title/Abstract] OR "emotionally focused"[Title/Abstract] OR "emotional<br>focused"[Title/Abstract] OR "exposure therap*"[Title/Abstract] OR "family<br>intervent*"[Title/Abstract] OR "family therap*"[Title/Abstract] OR "group<br>intervent*"[Title/Abstract] OR "group therap*"[Title/Abstract] OR<br>"meditation"[Title/Abstract] OR "metacognitive therap*"[Title/Abstract] OR<br>"metacognitive training"[Title/Abstract] OR "meta-cognitive therap*"[Title/Abstract]<br>OR "meta-cognitive training"[Title/Abstract] or "mindfulness"[Title/Abstract] OR<br>"morita therap*"[Title/Abstract] OR "narrative therap*"[Title/Abstract] OR "problem<br>solv*"[Title/Abstract] OR "psychoanaly*"[Title/Abstract] OR<br>"psychodynamic*"[Title/Abstract] OR "psychoeducat*"[Title/Abstract] OR<br>"psychological treatment*"[Title/Abstract] OR "psychological<br>intervent*"[Title/Abstract] OR "psychosocial treatment*"[Title/Abstract] OR<br>"psychosocial intervent*"[Title/Abstract] OR "psychotherap*"[Title/Abstract] OR |

|   |                                                                                                                                                                                                                                                                                                                                                                                                                                                                                                                                                                                                                                                                                                                                                                   |
|---|-------------------------------------------------------------------------------------------------------------------------------------------------------------------------------------------------------------------------------------------------------------------------------------------------------------------------------------------------------------------------------------------------------------------------------------------------------------------------------------------------------------------------------------------------------------------------------------------------------------------------------------------------------------------------------------------------------------------------------------------------------------------|
|   | "socioenvironmental therap*"[Title/Abstract] OR "social skills training*"[Title/Abstract] OR "supportive therap*"[Title/Abstract] OR "psychiatric rehabili*"[Title/Abstract] OR "psychosocial rehabili*"[Title/Abstract] OR "token economy"[Title/Abstract] OR "peer support*"[Title/Abstract] OR "peer deliver*"[Title/Abstract] OR "supported employment"[Title/Abstract] OR "advance directive*"[Title/Abstract] OR "crisis plan*"[Title/Abstract] OR "wellness recovery action planning"[Title/Abstract] OR "illness management"[Title/Abstract] OR "refocus"[Title/Abstract] OR "individual placement and support"[Title/Abstract] OR "supported housing"[Title/Abstract] OR "open dialogue"[Title/Abstract] OR "community treatment order*"[Title/Abstract] |
| 3 | "randomized controlled trials as topic"[MeSH Terms] OR "controlled clinical trial"[Publication Type] OR "random*"[Title/Abstract] OR "RCT"[Title/Abstract] or "control*"[Title/Abstract] OR "trial*"[Title/Abstract] OR "condition*"[Title/Abstract]                                                                                                                                                                                                                                                                                                                                                                                                                                                                                                              |
| 4 | #1 AND #2 AND #3                                                                                                                                                                                                                                                                                                                                                                                                                                                                                                                                                                                                                                                                                                                                                  |
| 5 | #4 NOT ("animals"[MeSH Terms] NOT "humans"[MeSH Terms])                                                                                                                                                                                                                                                                                                                                                                                                                                                                                                                                                                                                                                                                                                           |

## Embase (via Elsevier)

| Line | Query                                                                                                                                                                                                                                                                                                                                                                                                                                                                                                                                                                                                                                                                                                                                                                                                                                                                                                                                                                                                                                                                                                                                                                                                                                                                    |
|------|--------------------------------------------------------------------------------------------------------------------------------------------------------------------------------------------------------------------------------------------------------------------------------------------------------------------------------------------------------------------------------------------------------------------------------------------------------------------------------------------------------------------------------------------------------------------------------------------------------------------------------------------------------------------------------------------------------------------------------------------------------------------------------------------------------------------------------------------------------------------------------------------------------------------------------------------------------------------------------------------------------------------------------------------------------------------------------------------------------------------------------------------------------------------------------------------------------------------------------------------------------------------------|
| #1   | 'psychosis'/exp OR (schizo* OR psychotic* OR psychosis OR psychoses):ti,ab                                                                                                                                                                                                                                                                                                                                                                                                                                                                                                                                                                                                                                                                                                                                                                                                                                                                                                                                                                                                                                                                                                                                                                                               |
| #2   | 'psychotherapy'/exp OR 'psychoanalysis'/exp OR 'counseling'/exp OR 'community mental health service'/exp OR 'psychosocial rehabilitation'/exp OR (acceptance near/2 commitment* OR assertive* near/1 communit* OR (behavior* or behaviour*) near/1 (modificat* or regulat* or therap*) OR cognit* near/2 (behavio* or intervent* or rehabilitat* or remedi* or technique* or therap* or treatment*) OR compassion* near/1 focused* OR (conversation* or conversion* or supportive or socioenvironment*) near/1 therap* OR counse?ing OR emotion* near/1 focused* OR exposure near/1 therap* OR (family or group) near/1 (intervent* or therap*) OR meditation* OR (metacognitive or meta-cognitive) near/1 (therap* or training*) OR mindfulness OR morita near/1 therap* OR narrative near/1 therap* OR problem near/1 solv* OR psychoanaly* OR psychodynamic* OR psychoeducat* OR psychological near/1 (treatment* or intervent*) OR psychosocial near/1 (treatment* or intervent*) OR psychotherap* OR social near/1 skill* near/1 training* OR (psychosocial* or psychiatric*) near/1 rehabilitat*<br><br>OR token near/1 economy OR peer near/1 support* OR peer near/1 deliver* OR supported near/1 employment OR advance near/1 directive* OR crisis near/1 plan* |

|    |                                                                                                                                                                                                                                   |
|----|-----------------------------------------------------------------------------------------------------------------------------------------------------------------------------------------------------------------------------------|
|    | OR 'wellness recovery action planning' OR 'illness management and recovery program' OR refocus OR 'individual placement and support' OR supported near/1 housing OR 'open dialogue' OR 'community treatment' near/1 order*):ti,ab |
| #3 | 'controlled clinical trial'/exp OR (random* or control* or trial* or condition* or rct):ti,ab                                                                                                                                     |
| #4 | #1 AND #2 AND #3                                                                                                                                                                                                                  |
| #5 | #4 NOT ('animal experiment'/de NOT ('human experiment'/de OR 'human'/de))                                                                                                                                                         |

## PsycINFO (via EBSCO host)

| Line | Query                                                                                                                                                                                                                                                                                                                                                                                                                                                                                                                                                                                                                                                                                                                                                                                                                                                                                                                                                                                                                                                                                                                                                                                                                                                                                                                                                                                                                                                                                                                                                          |
|------|----------------------------------------------------------------------------------------------------------------------------------------------------------------------------------------------------------------------------------------------------------------------------------------------------------------------------------------------------------------------------------------------------------------------------------------------------------------------------------------------------------------------------------------------------------------------------------------------------------------------------------------------------------------------------------------------------------------------------------------------------------------------------------------------------------------------------------------------------------------------------------------------------------------------------------------------------------------------------------------------------------------------------------------------------------------------------------------------------------------------------------------------------------------------------------------------------------------------------------------------------------------------------------------------------------------------------------------------------------------------------------------------------------------------------------------------------------------------------------------------------------------------------------------------------------------|
| S1   | DE "Schizophrenia" OR DE "Acute Schizophrenia" OR DE "Catatonic Schizophrenia" OR DE "Paranoid Schizophrenia" OR DE "Process Schizophrenia" OR DE "Schizoaffective Disorder" OR DE "Schizophrenia (Disorganized Type)" OR DE "Schizophreniform Disorder" OR DE "Undifferentiated Schizophrenia" DE "Delusions" OR TI (schizo* OR psychotic* OR psychosis OR psychoses) OR AB (schizo* OR psychotic* OR psychosis OR psychoses)                                                                                                                                                                                                                                                                                                                                                                                                                                                                                                                                                                                                                                                                                                                                                                                                                                                                                                                                                                                                                                                                                                                                 |
| S2   | DE "Psychotherapy" OR DE "Analytical Psychotherapy" OR DE "Client Centered Therapy" OR DE "Conversion Therapy" OR "Emotion Focused Therapy" OR DE "Group Psychotherapy" OR DE "Individual Psychotherapy" OR DE "Narrative Therapy" OR DE "Psychoanalysis" OR DE "Psychodynamic Psychotherapy" OR DE "Psychotherapeutic Counseling" OR DE "Psychotherapeutic Techniques" OR DE "Supportive Psychotherapy" OR DE "Psychosocial Rehabilitation" OR DE "Psychosocial Readjustment" OR DE "Therapeutic Social Clubs" OR DE "Vocational Rehabilitation" OR DE "Community Mental Health Services" OR DE "Community Services" OR DE "Community Welfare Services" OR DE "Emergency Services" OR DE "Home Care" OR DE "Home Visiting Programs" OR DE "Public Health Services" OR DE "Mental Health Services" OR MM "Assertive Community Treatment" OR TI ("acceptance and commitment therap*" OR "analytical psychotherap*" OR "assertive communit*" OR "behavior modificat*" OR "behaviour regulat*" OR "behavior therap*" OR "behaviour modificat*" OR "behaviour regulat*" OR "behaviour therap*" OR "behavioral modificat*" OR "behavioral regulat*" OR "behavioral therap*" OR "behavioural modificat*" OR "behavioural regulat*" OR "behavioural therap*" OR "cognitive behavio*" OR "cognitive intervent*" OR "cognitive rehabilit*" OR "cognitive remediat*" OR "cognitive technique*" OR "cognitive therap*" OR "cognitive treatment*" OR "compassion focused" OR "conversational therap*" OR "conversion therap*" OR "counseling" OR "counselling" OR "emotion |



focused" OR "emotionally focused" OR "emotional focused" OR "exposure therap\*" OR "expressive psychotherap\*" OR "family intervent\*" OR "family therap\*" OR "group intervention\*" OR "group psychotherap\*" OR "group therap\*" OR "meditation" OR "metacognitive therap\*" OR "metacognitive training" OR "meta-cognitive therap\*" OR "meta-cognitive training" OR "mindfulness" OR "morita therap\*" OR "narrative therap\*" OR "problem solv\*" OR "psychiatric rehabili\*" OR "psychoanaly\*" OR "psychodynamic" OR "psychoeducat\*" OR "psychological treatment\*" OR "psychological intervent\*" OR "psychosocial treatment\*" OR "psychosocial intervent\*" OR "psychosocial rehabili\*" OR "psychotherap\*" OR "socioenvironmental therap\*" OR "social skills training" OR "supportive therap\*" OR "token economy" OR "peer support\*" OR "peer deliver\*" OR "supported employment" OR "advance directive\*" OR "crisis plan\*" OR "wellness recovery action planning" OR "illness management and recovery program" OR "refocus" OR "individual placement and support" OR "supported housing" OR "open dialogue" OR "community treatment order\*") OR AB ("acceptance and commitment therap\*" OR "analytical psychotherap\*" OR "assertive communit\*" OR "behavior modificat\*" OR "behaviour regulat\*" OR "behavior therap\*" OR "behaviour modificat\*" OR "behaviour regulat\*" OR "behaviour therap\*" OR "behavioral modificat\*" OR "behavioral regulat\*" OR "behavioral therap\*" OR "behavioural modificat\*" OR "behavioural regulat\*" OR "behavioural therap\*" OR "cognitive behavio\*" OR "cognitive intervent\*" OR "cognitive rehabilit\*" OR "cognitive remediat\*" OR "cognitive technique\*" OR "cognitive therap\*" OR "cognitive treatment\*" OR "compassion focused" OR "conversational therap\*" OR "conversion therap\*" OR "counseling" OR "counselling" OR "emotion focused" OR "emotionally focused" OR "emotional focused" OR "exposure therap\*" OR "expressive psychotherap\*" OR "family intervent\*" OR "family therap\*" OR "group intervention\*" OR "group psychotherap\*" OR "group therap\*" OR "meditation" OR "metacognitive therap\*" OR "metacognitive training" OR "meta-cognitive therap\*" OR "meta-cognitive training" OR "mindfulness" OR "morita therap\*" OR "narrative therap\*" OR "problem solv\*" OR "psychiatric rehabili\*" OR "psychoanaly\*" OR "psychodynamic" OR "psychoeducat\*" OR "psychological treatment\*" OR "psychological intervent\*" OR "psychosocial treatment\*" OR "psychosocial intervent\*" OR "psychosocial rehabili\*" OR "psychotherap\*" OR "socioenvironmental therap\*" OR "social skills training" OR "supportive therap\*" OR "token economy" OR "peer support\*" OR "peer deliver\*" OR "supported employment" OR "advance directive\*" OR "crisis plan\*" OR "wellness recovery action planning" OR "illness management and recovery program"

|    |                                                                                                                                                                                                                    |
|----|--------------------------------------------------------------------------------------------------------------------------------------------------------------------------------------------------------------------|
|    | OR "refocus" OR "individual placement and support" OR "supported housing" OR "open dialogue" OR "community treatment order*")                                                                                      |
| S3 | DE "Clinical Trials" OR DE "Randomized Controlled Trials" OR DE "Randomized Clinical Trials" OR TI (random* OR RCT or control* OR trial* OR condition*) OR AB (random* OR RCT or control* OR trial* OR condition*) |
| S4 | S1 AND S2 AND S3                                                                                                                                                                                                   |
| S5 | S4 NOT (DE "Animals" OR DE "Animal Research" OR TI "animal model*" OR AB "animal model*")                                                                                                                          |

## CINAHL (via EBSCO host)

| Line | Search query                                                                                                                                                                                                                                                                                                                                                                                                                                                                                                                                                                                                                                                                                                                                                                                                                                                                                                                                                                                                                                                                                                                                                                                                                                                                                                                                                                                                                                                                                                                                                                                                                                                                                                                                      |
|------|---------------------------------------------------------------------------------------------------------------------------------------------------------------------------------------------------------------------------------------------------------------------------------------------------------------------------------------------------------------------------------------------------------------------------------------------------------------------------------------------------------------------------------------------------------------------------------------------------------------------------------------------------------------------------------------------------------------------------------------------------------------------------------------------------------------------------------------------------------------------------------------------------------------------------------------------------------------------------------------------------------------------------------------------------------------------------------------------------------------------------------------------------------------------------------------------------------------------------------------------------------------------------------------------------------------------------------------------------------------------------------------------------------------------------------------------------------------------------------------------------------------------------------------------------------------------------------------------------------------------------------------------------------------------------------------------------------------------------------------------------|
| S1   | MH "Schizophrenia+" OR MH "Schizoaffective Disorder" OR MH "Delusions" OR TI (schizo* OR psychotic* OR psychosis OR psychoses) OR AB (schizo* OR psychotic* OR psychosis OR psychoses)                                                                                                                                                                                                                                                                                                                                                                                                                                                                                                                                                                                                                                                                                                                                                                                                                                                                                                                                                                                                                                                                                                                                                                                                                                                                                                                                                                                                                                                                                                                                                            |
| S2   | MH "Psychotherapy+" OR MH "Psychoanalysis" OR MH "Psychological Processes and Principles+" OR MH "Rehabilitation, Psychosocial+" OR MM "Community Mental Health Services" OR TI ("acceptance and commitment therap*" OR "analytical psychotherap*" OR "assertive communit*" OR "behavior modificat*" OR "behaviour regulat*" OR "behavior therap*" OR "behaviour modificat*" OR "behaviour regulat*" OR "behaviour therap*" OR "behavioral modificat*" OR "behavioral regulat*" OR "behavioral therap*" OR "behavioural modificat*" OR "behavioural regulat*" OR "behavioural therap*" OR "cognitive behavio*" OR "cognitive intervent*" OR "cognitive rehabilit*" OR "cognitive remediat*" OR "cognitive technique*" OR "cognitive therap*" OR "cognitive treatment*" OR "compassion focused" OR "conversational therap*" OR "conversion therap*" OR "counseling" OR "counselling" OR "emotion focused" OR "emotionally focused" OR "emotional focused" OR "exposure therap*" OR "expressive psychotherap*" OR "family intervent*" OR "family therap*" OR "group intervention*" OR "group psychotherap*" OR "group therap*" OR "meditation" OR "metacognitive therap*" OR "metacognitive training" OR "meta-cognitive therap*" OR "meta-cognitive training" OR "mindfulness" OR "morita therap*" OR "narrative therap*" OR "problem solv*" OR "psychiatric rehabili*" OR "psychoanaly*" OR "psychodynamic" OR "psychoeducat*" OR "psychological treatment*" OR "psychological intervent*" OR "psychosocial treatment*" OR "psychosocial intervent*" OR "psychosocial rehabili*" OR "psychotherap*" OR "socioenvironmental therap*" OR "social skills training" OR "supportive therap*" OR "token economy" OR "peer support*" OR "peer deliver*") |

|    |                                                                                                                                                                                                                                                                                                                                                                                                                                                                                                                                                                                                                                                                                                                                                                                                                                                                                                                                                                                                                                                                                                                                                                                                                                                                                                                                                                                                                                                                                                                                                                                                                                                                                                                                                                                                                                                                                                                                                                                                                                                                                                                                                      |
|----|------------------------------------------------------------------------------------------------------------------------------------------------------------------------------------------------------------------------------------------------------------------------------------------------------------------------------------------------------------------------------------------------------------------------------------------------------------------------------------------------------------------------------------------------------------------------------------------------------------------------------------------------------------------------------------------------------------------------------------------------------------------------------------------------------------------------------------------------------------------------------------------------------------------------------------------------------------------------------------------------------------------------------------------------------------------------------------------------------------------------------------------------------------------------------------------------------------------------------------------------------------------------------------------------------------------------------------------------------------------------------------------------------------------------------------------------------------------------------------------------------------------------------------------------------------------------------------------------------------------------------------------------------------------------------------------------------------------------------------------------------------------------------------------------------------------------------------------------------------------------------------------------------------------------------------------------------------------------------------------------------------------------------------------------------------------------------------------------------------------------------------------------------|
|    | OR "supported employment" OR "advance directive*" OR "crisis plan*" OR "wellness recovery action planning" OR "illness management and recovery program" OR "refocus" OR "individual placement and support" OR "supported housing" OR "open dialogue" OR "community treatment order*") OR AB ("acceptance and commitment therap*" OR "analytical psychotherap*" OR "assertive communit*" OR "behavior modificat*" OR "behaviour regulat*" OR "behavior therap*" OR "behaviour modificat*" OR "behaviour regulat*" OR "behaviour therap*" OR "behavioral modificat*" OR "behavioral regulat*" OR "behavioral therap*" OR "behavioural modificat*" OR "behavioural regulat*" OR "behavioural therap*" OR "cognitive behavio*" OR "cognitive intervent*" OR "cognitive rehabilit*" OR "cognitive remediat*" OR "cognitive technique*" OR "cognitive therap*" OR "cognitive treatment*" OR "compassion focused" OR "conversational therap*" OR "conversion therap*" OR "counseling" OR "counselling" OR "emotion focused" OR "emotionally focused" OR "emotional focused" OR "exposure therap*" OR "expressive psychotherap*" OR "family intervent*" OR "family therap*" OR "group intervention*" OR "group psychotherap*" OR "group therap*" OR "meditation" OR "metacognitive therap*" OR "metacognitive training" OR "meta-cognitive therap*" OR "meta-cognitive training" OR "mindfulness" OR "morita therap*" OR "narrative therap*" OR "problem solv*" OR "psychiatric rehabilit*" OR "psychoanaly*" OR "psychodynamic" OR "psychoeducat*" OR "psychological treatment*" OR "psychological intervent*" OR "psychosocial treatment*" OR "psychosocial intervent*" OR "psychosocial rehabilit*" OR "psychotherap*" OR "socioenvironmental therap*" OR "social skills training" OR "supportive therap*" OR "token economy" OR "peer support*" OR "peer deliver*" OR "supported employment" OR "advance directive*" OR "crisis plan*" OR "wellness recovery action planning" OR "illness management and recovery program" OR "refocus" OR "individual placement and support" OR "supported housing" OR "open dialogue" OR "community treatment order*") |
| S3 | MH "Clinical Trials+" OR MH "Random Assignment" OR PT Clinical Trial OR TI (random* OR RCT or control* OR trial* OR condition*) OR AB (random* OR RCT or control* OR trial* OR condition*)                                                                                                                                                                                                                                                                                                                                                                                                                                                                                                                                                                                                                                                                                                                                                                                                                                                                                                                                                                                                                                                                                                                                                                                                                                                                                                                                                                                                                                                                                                                                                                                                                                                                                                                                                                                                                                                                                                                                                           |
| S4 | S1 AND S2 AND S3                                                                                                                                                                                                                                                                                                                                                                                                                                                                                                                                                                                                                                                                                                                                                                                                                                                                                                                                                                                                                                                                                                                                                                                                                                                                                                                                                                                                                                                                                                                                                                                                                                                                                                                                                                                                                                                                                                                                                                                                                                                                                                                                     |
| S5 | S4 NOT ((MH "Animals+" OR MM "Animal Studies" OR TI "animal model*" OR AB "animal model*") NOT MM "Human")                                                                                                                                                                                                                                                                                                                                                                                                                                                                                                                                                                                                                                                                                                                                                                                                                                                                                                                                                                                                                                                                                                                                                                                                                                                                                                                                                                                                                                                                                                                                                                                                                                                                                                                                                                                                                                                                                                                                                                                                                                           |

Cochrane Central Register of Controlled Trials (CENTRAL)

| Line | Query                                                                                                                                                                                                                                                                                                                                                                                                                                                                                                                                                                                                                                                                                                                                                                                                                                                                                                                                                                                                                                                                                                                                                                                                                                                                                                                                                                                                                                                                                                                                                             |
|------|-------------------------------------------------------------------------------------------------------------------------------------------------------------------------------------------------------------------------------------------------------------------------------------------------------------------------------------------------------------------------------------------------------------------------------------------------------------------------------------------------------------------------------------------------------------------------------------------------------------------------------------------------------------------------------------------------------------------------------------------------------------------------------------------------------------------------------------------------------------------------------------------------------------------------------------------------------------------------------------------------------------------------------------------------------------------------------------------------------------------------------------------------------------------------------------------------------------------------------------------------------------------------------------------------------------------------------------------------------------------------------------------------------------------------------------------------------------------------------------------------------------------------------------------------------------------|
| #1   | [mh "Schizophrenia Spectrum and Other Psychotic Disorders"] or (schizo* or psychotic* or psychosis or psychoses):ti,ab,kw                                                                                                                                                                                                                                                                                                                                                                                                                                                                                                                                                                                                                                                                                                                                                                                                                                                                                                                                                                                                                                                                                                                                                                                                                                                                                                                                                                                                                                         |
| #2   | [mh Psychotherapy] or [mh Psychoanalysis] or [mh Counseling] or [mh "community mental health services"] or [mh "psychiatric rehabilitation"] or ("acceptance and commitment" or (analytical next psychotherap*) or "assertive community" or ((behavior* or behaviour*) next (modificat* or regulat* or therap*)) or (cognit* next (behavio* or intervent* or rehabili* or remediat* or technique* or therap* or treatment*)) or (compassion* next focused) or ((conversation* or conversion*) next therap*) or counse*ing or (emotion* next focused) or (exposure next therap*) or ((family or group) next (intervent* or therap*)) or meditation* or ((metacognitiv* or meta-cognitiv*) next (therap* or training*)) or mindfulness or (morita next therap*) or (narrative next therap*) or (problem next solv*) or psychoanaly* or psychodynamic* or psychoeducat* or psychological next (treatment* or intervent*) or psychosocial next (treatment* or intervent*) or psychotherap* or (social* next skill* next training*) or ((supportive* or socioenvironment*) next therap*) or ((psychiatric* or psychosocial*) next rehabili*) or "community mental health service" or "token economy" or (peer next support*) or (peer next deliver*) or "supported employment" or (advance next directive*) or (crisis next plan*) or "wellness recovery action planning" or "illness management and recovery program" or "refocus" or "individual placement and support" or "supported housing" or "open dialogue" or (community next treatment next order*):ti,ab,kw |
| #3   | [mh "Controlled Clinical Trial"] or [mh "Randomized Controlled Trials as Topic"] or (control* or trial* or condition* or random* or rct):ti,ab,kw,pt                                                                                                                                                                                                                                                                                                                                                                                                                                                                                                                                                                                                                                                                                                                                                                                                                                                                                                                                                                                                                                                                                                                                                                                                                                                                                                                                                                                                              |
| #4   | #1 and #2 and #3 in Trials                                                                                                                                                                                                                                                                                                                                                                                                                                                                                                                                                                                                                                                                                                                                                                                                                                                                                                                                                                                                                                                                                                                                                                                                                                                                                                                                                                                                                                                                                                                                        |

## ClinicalTrials.gov

| Search field           | Query                                                                                                                                                                                     |
|------------------------|-------------------------------------------------------------------------------------------------------------------------------------------------------------------------------------------|
| Condition or disease   | schizo* OR psychotic* OR psychosis OR psychoses                                                                                                                                           |
| Other terms            | random OR rct                                                                                                                                                                             |
| Study type             | Interventional studies(clinical trials)                                                                                                                                                   |
| Study Results          | All Studies                                                                                                                                                                               |
| Age Group              | Adult (18-64) OR Older Adult (65+)                                                                                                                                                        |
| Intervention/treatment | assertive community OR cognitive behavio* OR counseling OR family therap* OR psychoeducat* OR psychosocial intervention* OR psychotherap* OR social skills training OR supportive therap* |

## World Health Organisation International Clinical Trials Registry Platform (ICTRP)

| Search field       | Query                                                                                                                                                                                     |
|--------------------|-------------------------------------------------------------------------------------------------------------------------------------------------------------------------------------------|
| Condition          | schizo* OR psychotic* OR psychosis OR psychoses                                                                                                                                           |
| Intervention       | assertive community OR cognitive behavio* OR counseling OR family therap* OR psychoeducat* OR psychosocial intervention* OR psychotherap* OR social skills training OR supportive therap* |
| Recruitment status | ALL                                                                                                                                                                                       |

## OpenGrey

(schizo\* OR psychotic\* OR psychosis OR psychoses) AND ("assertive community" OR counseling OR "family therap\*" OR "behavioral therap\*" OR psychoeducat\* OR psychotherap\* OR "supportive therap\*") AND (random\* OR rct)
